# Supplementary material
Source: PubMed Central journal article supplement (PMC7172206)
Supplement: mmc1.pdf [file mmc1.pdf]

**Novel hantavirus identified in black-bearded tomb bats, China**

Lin Xu, Jianmin Wu, Biao He, Shaomin Qin, Lele Xia, Minchao Qin, Nan Li,

Changchun Tu

**Supplementary materials**

Table. S. Oligonucleotide primers used to amplify Laibin virus from the positive lung tissue.

| <b>Primer</b> | <b>Sequence(5'-3')</b>  | <b>Segment</b> | <b>Polarity</b> |
|---------------|-------------------------|----------------|-----------------|
| HVSF1         | TAGTAGTAGACTCCTTRAARAGC | S              | +               |
| HVSF1283      | CAAACCTAGTAGGAACTGCTGA  | S              | +               |
| HVSR1071      | AGCTCNGGATCCATITCATC    | S              | -               |
| HVSR1906      | TAGTAGTAKRCWCCYTRARAAG  | S              | -               |
| HVMF1         | TAGTAGTAGACWCCGCAAAAG   | M              | +               |
| HVMF1150      | GGACCAGGTGCADCTTGTGAAGC | M              | +               |
| HVMF2517      | GTAGTAACCATGCTAAGGTATG  | M              | +               |
| HVMR1368      | CTTTTCTTTGCCATTG        | M              | -               |
| HVMR2611      | CATGAYATCTCCAGGGTCHCC   | M              | -               |
| HVMR3684      | TAGTAGTATRCTCCGCARG     | M              | -               |
| HVLF1         | TAGTAGTAGACTCCRGA       | L              | +               |
| HVLF186       | ATGATAAARCATGAYTGGTC    | L              | +               |
| HVLF1959      | GCTAGTTAYTCMGGTGCTGC    | L              | +               |
| HVLF3341      | TTGCHCAYCAYTCWGAYGATGC  | L              | +               |
| HVLF5178      | TCWGGDAARCARTATGATGC    | L              | +               |
| HVLR400       | GTGTTTTACCTGTAGGGT      | L              | -               |
| HVLR2260      | TGDATYTTDGCTTCTTCWGTC   | L              | -               |
| HVLR3393      | AACCADTCWGTYCCRTCATC    | L              | -               |
| HVLR5500      | CTCTTTAGTCACCTCTTCCAT   | L              | -               |
| HVLR6561      | TAGTAGTAGTAKRCTCCGRGA   | L              | -               |

Fig. S. Electron microscopy of a negatively stained LBV particle from the positive bat lung tissue.

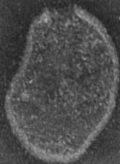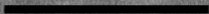

200 nm
